# Supplementary material for: Production of Membrane Vesicles in Listeria monocytogenes Cultured with or without Sub-Inhibitory Concentrations of Antibiotics and Their Innate Immune Responses In Vitro
Source: MDPI journal article supplement (doi:10.3390/genes12030415), 2021-03-13
Supplement: s1 [file s1]

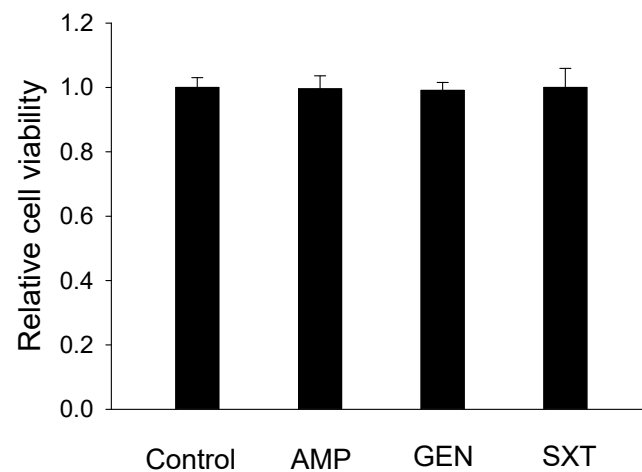

**Figure S1. Viabilities of Caco-2 cells treated with 1/2 MICs of antibiotics.** Caco-2 cells were treated with 0.25  $\mu\text{g}/\text{ml}$  ampicillin (AMP), 0.25  $\mu\text{g}/\text{ml}$  gentamicin (GEN), or 0.25/1.25  $\mu\text{g}/\text{ml}$  trimethoprim/sulfamethoxazole (SXT) for 24 h. Cell viability was determined using an MTT assay. Antibiotics were not cytotoxic to Caco-2 cells.
